# Supplementary material
Source: publisher figshare collection journal article supplement (https://acs.figshare.com/ndownloader/files/3765475)
Supplement: Supplementary file 1 [file 3765475]

# Supporting Information

## Projecting Fine Particulate Matter-related Mortality in East China

Lina Madaniyazi, Tatsuya Nagashima, Yuming Guo, Weiwei Yu, Shilu Tong\*

Lina Madaniyazi, School of Public Health and Social Work, Queensland University of Technology, Kelvin Grove, QLD 4059, Australia.

Email: [lina.madaniyazi@student.qut.edu.au](mailto:lina.madaniyazi@student.qut.edu.au)

Tatsuya Nagashima, Center for Regional Environmental Research (Regional Atmospheric Modeling Section), National Institute for Environmental Studies, 16-2 Onogawa, Tsukuba, Ibaraki, 305-8506, Japan

Email: [nagashima.tatsuya@nies.go.jp](mailto:nagashima.tatsuya@nies.go.jp)

Yuming Guo, Weiwei Yu, School of Population Health, University of Queensland, Herston QLD 4006, Australia.

Email: [y.guo1@uq.edu.au](mailto:y.guo1@uq.edu.au), [w.yu@uq.edu.au](mailto:w.yu@uq.edu.au)

\*Corresponding author:

Prof. Shilu Tong, School of Public Health and Social Work, Institute of Health Biomedical Innovation, Queensland University of Technology, Kelvin Grove, QLD 4059, Australia.

Telephone: +61 7 3138 9745, Fax: +61 7 3138 3369. Email: [s.tong@qut.edu.au](mailto:s.tong@qut.edu.au)

|    |                                                                                                                |     |
|----|----------------------------------------------------------------------------------------------------------------|-----|
| 22 | <b>Contents</b>                                                                                                |     |
| 23 |                                                                                                                |     |
| 24 | 1. The PM <sub>2.5</sub> -mortality associations (CRF):.....                                                   | S3  |
| 25 | 2. The risk assessment models and their choices on mortality rate, population and CRF .....                    | S8  |
| 26 | Table S2. The risk assessment models and their choices on mortality rate, population and CRF.....              | S8  |
| 27 | 3. The ranges for estimated PM <sub>2.5</sub> -related total, cardiovascular and respiratory mortality (cases) |     |
| 28 | between 2005 and 2030 .....                                                                                    | S9  |
| 29 | 4. The characteristics of similar projection studies conducted in China.....                                   | S10 |
| 30 | 5. The changes of annual concentration of PM <sub>2.5</sub> components between 2005 and 2030 under CLE and     |     |
| 31 | MFR scenarios in East China.....                                                                               | S11 |
| 32 |                                                                                                                |     |
| 33 |                                                                                                                |     |
| 34 |                                                                                                                |     |
| 35 |                                                                                                                |     |
| 36 |                                                                                                                |     |
| 37 |                                                                                                                |     |
| 38 |                                                                                                                |     |
| 39 |                                                                                                                |     |
| 40 |                                                                                                                |     |
| 41 |                                                                                                                |     |

## **1. The PM<sub>2.5</sub>-mortality associations (CRF):**

Several studies have been conducted in China to investigate the relationships between PM<sub>2.5</sub> and total, cardiovascular and respiratory mortality. Most of them were conducted in East China. Thus, we used a meta-analysis to pool averaged associations of PM<sub>2.5</sub> with total, cardiovascular and respiratory mortality from those studies conducted in East China.

First, a literature search was conducted using the electronic databases PubMed, MEDLINE (Web of Knowledge), Embase, CNKI (Chinese National Knowledge Infrastructure), and Wanfang Database. CNKI and Wanfang Database are the two largest databases in China. The search was limited to journal articles published in English and Chinese from January 1990 through October 2013. The following key words were used: a). fine particles, PM<sub>2.5</sub>; b). mortality, death; c). China, Chinese, and the names of municipalities, provinces and corresponding capitals in East China. References and citations of the articles identified were manually inspected to ensure that all relevant articles were included. The following eligibility criteria were used: a). all epidemiological studies, involving the impact of PM<sub>2.5</sub> on mortality in Chinese population; b). the full texts were available; c). the study period was from 1990 to 2013; d). the study locations were in East China (including 3 municipalities (Beijing, Tianjin and Shanghai) and 8 provinces (Liaoning, Hebei, Shandong, Jiangsu, Zhejiang, Fujian, Guangdong and Hainan)); e). study population was not specific high-risks groups (e.g., elderly or children); f). the outcome must include at least one type of mortality (total, cardiovascular or respiratory); g). the results must include at least one of these measures: relative risk, regression coefficient or percent change of mortality;

Because some studies reported multiple estimates by exploring different lag days, age groups, seasons, and co-pollutants, only one estimate from each study -estimates for all ages, whole season and without adjustment for other pollutants- was included. <sup>1</sup> If one lag estimate was

reported, this estimate was used for our meta-analysis. For multiple lag days, we selected the lags following the rules: <sup>2, 3</sup> the lag with the most statistical significance or the largest effect estimate; the lag that the author focused on. The Cochran's Q-test indicates homogeneity among estimates ( $p > 0.05$ ), thus fixed-effect model was chosen to combine estimates.

**Table S1. The percent increase of total mortality (95CI %) associated with a 10- $\mu\text{g}/\text{m}^3$  increase of  $\text{PM}_{2.5}$  concentrations and detailed information for each study included in the meta-analysis.**

|   | Author                     | Study Field | Study Time | Study design and method        | Lag                            | PM <sub>2.5</sub> concentrations during the study period ( $\mu\text{g}/\text{m}^3$ ) | Results           |                          |                       |
|---|----------------------------|-------------|------------|--------------------------------|--------------------------------|---------------------------------------------------------------------------------------|-------------------|--------------------------|-----------------------|
|   |                            |             |            |                                |                                | Mean $\pm$ SD                                                                         | Total Mortality   | Cardiovascular Mortality | Respiratory Mortality |
| 1 | Chen, et al. <sup>4</sup>  | Shanghai    | 2001-2008  | Time series analysis (GAM)     | Lag0                           | 56 $\pm$ 33                                                                           | 0.17(0.02, 0.35)  | N.A.                     | N.A.                  |
| 2 | Geng, et al. <sup>5</sup>  | Shanghai    | 2007-2008  | Time series analysis (DLM)     | Lag0-Lag2 (cumulative effects) | 53.9 $\pm$ 31.4                                                                       | 0.57 (0.12, 0.26) | 0.79 (0.10, 1.48)        | 0.07 (-1.26, 1.40)    |
| 3 | Yang, et al. <sup>6</sup>  | Guangzhou   | 2007-2008  | Time-stratified case-crossover | lag0-1                         | 70.1 $\pm$ 34.6                                                                       | 0.90 (0.55, 1.26) | 1.22 (0.63, 1.81)        | 0.97 (0.17, 1.77)     |
| 4 | Chen, et al. <sup>7</sup>  | Beijing     | 2007-2008  | Time series analysis (GLM)     | Lag0-lag2                      | 82 $\pm$ 52                                                                           | 0.53(0.37,0.69)   | 0.58 (0.34, 0.82)        | 0.66 (0.21, 1.11)     |
|   |                            | Shanghai    | 2004-2008  |                                |                                | 55 $\pm$ 30                                                                           | 0.47(0.22,0.72)   | 0.41 (0.00, 0.82)        | 0.61 (-0.15, 1.37)    |
|   |                            | Shenyang    | 2006-2008  |                                |                                | 94 $\pm$ 52                                                                           | 0.35(0.17,0.53)   | 0.46 (0.19, 0.73)        | 0.29 (-0.30, 0.88)    |
| 5 | Ma, et al. <sup>8</sup>    | Shenyang    | 2006-2008  | Time-stratified case-crossover | lag0-1                         | 75 $\pm$ 43                                                                           | 0.49(0.19, 0.79)  | 0.53 (0.10, 0.96)        | 0.97 (0.01, 1.93)     |
| 6 | Huang, et al. <sup>9</sup> | Shanghai    | 2004-2005  | Time series analysis (GAM)     | Lag0                           | 56.4 $\pm$ 1.34                                                                       | 0.30(0.06, 0.54)  | 0.39 (0.12, 0.66)        | 0.71 (0.04, 1.38)     |
| 7 | Kan, et al. <sup>10</sup>  | Shanghai    | 2004-2005  | Time series analysis (GAM)     | lag0-1                         | 56.4 $\pm$ 1.34                                                                       | 0.36(0.11, 0.61)  | 0.41 (0.02, 0.80)        | 0.95 (0.17, 1.73)     |
| 8 | Dai, et al. <sup>11</sup>  | Shanghai    | 2004       | Time series analysis (GAM)     |                                | 68.8 $\pm$ 47.9                                                                       | 0.85(0.32,1.39)   |                          |                       |

81 Abbreviations: DLM, Dynamic Linear Models; GAM, Generalized Additive Models; GLM, Generalized Linear Models.

## References:

1. Yan, M.; Liu, Z.; Liu, X.; Duan, H.; Li, T., Meta-Analysis of the Chinese Studies of the Association between Ambient Ozone and Mortality. *Chemosphere* 2013, 93, (6), 899-905.
2. Atkinson, R. W.; Cohen, A.; Mehta, S.; Anderson, H. R., Systematic Review and Meta-Analysis of Epidemiological Time-Series Studies on Outdoor Air Pollution and Health in Asia. *Air Qual Atmos Health* 2012, 5, (4), 383-391.
3. Shang, Y.; Sun, Z.; Cao, J.; Wang, X.; Zhong, L.; Bi, X.; Li, H.; Liu, W.; Zhu, T.; Huang, W., Systematic Review of Chinese Studies of Short-Term Exposure to Air Pollution and Daily Mortality. *Environ. Int.* 2013, 54, 100-111.
4. Chen, R.; Wang, X.; Meng, X.; Hua, J.; Zhou, Z.; Chen, B.; Kan, H., Communicating Air Pollution-Related Health Risks to the Public: An Application of the Air Quality Health Index in Shanghai, China. *Environ. Int.* 2013, 51, 168-173.
5. Geng, F.; Hua, J.; Mu, Z.; Peng, L.; Xu, X.; Chen, R.; Kan, H., Differentiating the Associations of Black Carbon and Fine Particle with Daily Mortality in a Chinese City. *Environ. Res.* 2013, 120, 27-32.
6. Yang, C.; Peng, X.; Huang, W.; Chen, R.; Xu, Z.; Chen, B.; Kan, H., A Time-Stratified Case-Crossover Study of Fine Particulate Matter Air Pollution and Mortality in Guangzhou, China. *Int. Arch. Occup. Environ. Health* 2012, 85, (5), 579-85.
7. Chen, R.; Li, Y.; Ma, Y.; Pan, G.; Zeng, G.; Xu, X.; Chen, B.; Kan, H., Coarse Particles and Mortality in Three Chinese Cities: The China Air Pollution and Health Effects Study (Capes). *Sci. Total Environ.* 2011, 409, (23), 4934-4938.
8. Ma, Y.; Chen, R.; Pan, G.; Xu, X.; Song, W.; Chen, B.; Kan, H., Fine Particulate Air Pollution and Daily Mortality in Shenyang, China. *Sci. Total Environ.* 2011, 409, (13), 2473-2477.

9. Huang, W.; Cao, J.; Tao, Y.; Dai, L.; Lu, S.-E.; Hou, B.; Wang, Z.; Zhu, T., Seasonal Variation of Chemical Species Associated with Short-Term Mortality Effects of Pm<sub>2.5</sub> in Xi'an, a Central City in China. *Am. J. Epidemiol.* 2012, *175*, (6), 556-566.
10. Kan, H.; London, S. J.; Chen, G.; Zhang, Y.; Song, G.; Zhao, N.; Jiang, L.; Chen, B., Differentiating the Effects of Fine and Coarse Particles on Daily Mortality in Shanghai, China. *Environ. Int.* 2007, *33*, (3), 376-384.
11. Dai, H.; Song, W.; Gao, X.; Chen, L., Study on Relationship between Ambient Pm<sub>10</sub>, Pm<sub>2.5</sub> Pollution and Daily Mortality in a District in Shanghai. *Wei sheng yan jiu = Journal of hygiene research* 2004, *33*, (3), 293-297.

## 2. The risk assessment models and their choices on mortality rate, population and CRF

**Table S2. The risk assessment models and their choices on mortality rate, population and CRF**

| Model No. | Mortality <sup>Δ</sup> |                                 | Population 2005 | Population Projection Scenario 2030 |    |    |    |    | CRF                    |            |
|-----------|------------------------|---------------------------------|-----------------|-------------------------------------|----|----|----|----|------------------------|------------|
|           | Mortality 2005         | Total Mortality projection 2030 |                 | C                                   | L1 | L2 | H1 | H2 | CRF from Meta-analysis | local CRF* |
| M1        | ✓                      |                                 | ✓               |                                     |    |    |    |    | ✓                      |            |
| M2        | ✓                      |                                 |                 | ✓                                   |    |    |    |    | ✓                      |            |
| M3        | ✓                      |                                 |                 |                                     | ✓  |    |    |    | ✓                      |            |
| M4        | ✓                      |                                 |                 |                                     |    | ✓  |    |    | ✓                      |            |
| M5        | ✓                      |                                 |                 |                                     |    |    | ✓  |    | ✓                      |            |
| M6        | ✓                      |                                 |                 |                                     |    |    |    | ✓  | ✓                      |            |
| M7        |                        | ✓                               | ✓               |                                     |    |    |    |    | ✓                      |            |
| M8        | ✓                      |                                 | ✓               |                                     |    |    |    |    |                        | ✓          |
| M9        |                        | ✓                               |                 | ✓                                   |    |    |    |    | ✓                      |            |
| M10       |                        | ✓                               |                 |                                     | ✓  |    |    |    | ✓                      |            |
| M11       |                        | ✓                               |                 |                                     |    | ✓  |    |    | ✓                      |            |
| M12       |                        | ✓                               |                 |                                     |    |    | ✓  |    | ✓                      |            |
| M13       |                        | ✓                               |                 |                                     |    |    |    | ✓  | ✓                      |            |
| M14       |                        |                                 |                 | ✓                                   |    |    |    |    |                        | ✓          |
| M15       |                        |                                 |                 |                                     | ✓  |    |    |    |                        | ✓          |
| M16       |                        |                                 |                 |                                     |    | ✓  |    |    |                        | ✓          |
| M17       |                        |                                 |                 |                                     |    |    | ✓  |    |                        | ✓          |
| M18       |                        |                                 |                 |                                     |    |    |    | ✓  |                        | ✓          |
| M19       |                        | ✓                               |                 |                                     |    |    |    |    |                        | ✓          |
| M20       |                        | ✓                               |                 | ✓                                   |    |    |    |    |                        | ✓          |
| M21       |                        | ✓                               |                 |                                     | ✓  |    |    |    |                        | ✓          |
| M22       |                        | ✓                               |                 |                                     |    | ✓  |    |    |                        | ✓          |
| M23       |                        | ✓                               |                 |                                     |    |    | ✓  |    |                        | ✓          |
| M24       |                        | ✓                               |                 |                                     |    |    |    | ✓  |                        | ✓          |

\*There is one option on local CRF for Beijing, Shanghai and Guangdong. Thus, there are 24 risk assessment models in total for these three regions. There are two options on local CRF for Liaoning. Thus, except from the listed 24 risk assessment models, there are 12 more risk assessment models for Liaoning, which includes the second option on local CRF.

For other regions, there is no option on local CRF. Thus, there are 12 risk assessment models for such regions.

<sup>Δ</sup> There is only one projection on total mortality in 2030, without any projection on cardiovascular and respiratory mortality in 2030. Thus, for cardiovascular and respiratory mortality, there are 12 risk assessment models for Beijing, Shanghai and Guangzhou, 18 risk assessment models for Liaoning, and 6 risk assessment models for other regions.



### 3. The ranges for estimated PM<sub>2.5</sub>-related total, cardiovascular and respiratory mortality (cases) between 2005 and 2030

**Table S3. The ranges for estimated PM<sub>2.5</sub>-related total, cardiovascular and respiratory mortality (cases) between 2005 and 2030**

| Region            | Total Mortality |                  | Cardiovascular Mortality |                  | Respiratory Mortality |                |
|-------------------|-----------------|------------------|--------------------------|------------------|-----------------------|----------------|
|                   | CLE             | MFR              | CLE                      | MFR              | CLE                   | MFR            |
| <b>Beijing</b>    | 1074, 6501      | -4396, -2406     | 557, 3538                | -2252, -1364     | 136, 929              | -540, -337     |
| <b>Tianjin</b>    | 2275, 7593      | -6816, -5514     | 1692, 3526               | -4131, -3682     | 495, 971              | -1016, -899    |
| <b>Liaoning</b>   | 1494, 9522      | -17096, -11603   | 859, 2898                | -8264, -6981     | 102, 711              | -2461, -871    |
| <b>Hebei</b>      | 1156, 14013     | -39900, -36841   | 2478, 4588               | -10991, -10489   | 792, 1371             | -2902, -2764   |
| <b>Shanghai</b>   | 126, 29256      | -11497, -4380    | 65, 7096                 | -5800, -3930     | 33, 3210              | -2401, -1798   |
| <b>Shandong</b>   | 3578, 16114     | -64727, -61809   | 5733, 9798               | -31055, -30109   | 2828, 4430            | -11675, -11302 |
| <b>Jiangsu</b>    | 4179, 9368      | -61986, -60606   | 2589, 4165               | -19211, -18792   | 1481, 2130            | -7489, -7317   |
| <b>Zhejiang</b>   | 1227, 7529      | -23001, -21043   | 889, 2870                | -7449, -6833     | 860, 2297             | -5187, -4740   |
| <b>Fujian</b>     | -1337, 3395     | -9879, -8285     | -453, 1053               | -4010, -3503     | -111, 363             | -1233, -1073   |
| <b>Guangdong</b>  | -2865, 66558    | -51443, -9959    | -334, 17088              | -11359, -3000    | -938, 71671           | -16827, -4945  |
| <b>Hainan</b>     | -174, 611       | -1485, -1243     | -26, 415                 | -936, -800       | -2, 83                | -179, -153     |
| <b>East China</b> | -20679, 71719   | -368319, -229928 | -7653, 29993             | -162511, -152250 | -3942, 16907          | -72692, -66948 |

+excess deaths; - avoided deaths.

#### 4. The characteristics of similar projection studies conducted in China

**Table S4. The characteristics of similar projection studies conducted in China**

|                  | Study Area                                            | Time line              | Air pollutants                       | Scenarios                                                                                                                                       |
|------------------|-------------------------------------------------------|------------------------|--------------------------------------|-------------------------------------------------------------------------------------------------------------------------------------------------|
| Kan et al. 2004  | Shanghai                                              | 2000, 2010, 2020       | PM <sub>10</sub>                     | Base case scenario (BC), energy option scenarios, environmental target scenarios; carbon emission control scenario.                             |
| Li et al. 2004   | Shanghai                                              | 1995-2020              | PM <sub>10</sub>                     | Two pollution control scenarios for power generation and industry coal use, respectively                                                        |
| Wang et al. 2006 | Zaozhuang                                             | 2000-2020              | PM<br>(including PM <sub>2.5</sub> ) | Business-as-usual scenario, the best available emission control technology, and advanced coal gasification technologies.                        |
| Chen et al. 2007 | Shanghai                                              | 2000, 2010, 2020       | PM <sub>10</sub> and SO <sub>2</sub> | BC, low carbon scenarios                                                                                                                        |
| Pan et al. 2007  | Beijing                                               | 1999, 2010, 2020, 2030 | PM <sub>10</sub> and SO <sub>2</sub> | BAU, three energy use scenarios based on different assumptions on clean energy consumption, energy efficiency program and green transportation. |
| This study       | East China, including 11 provinces and municipalities | 2005, 2030             | PM <sub>2.5</sub>                    | CLE and MFR scenarios                                                                                                                           |

## 5. The changes of annual concentration of PM<sub>2.5</sub> components between 2005 and 2030 under CLE and MFR scenarios in East China

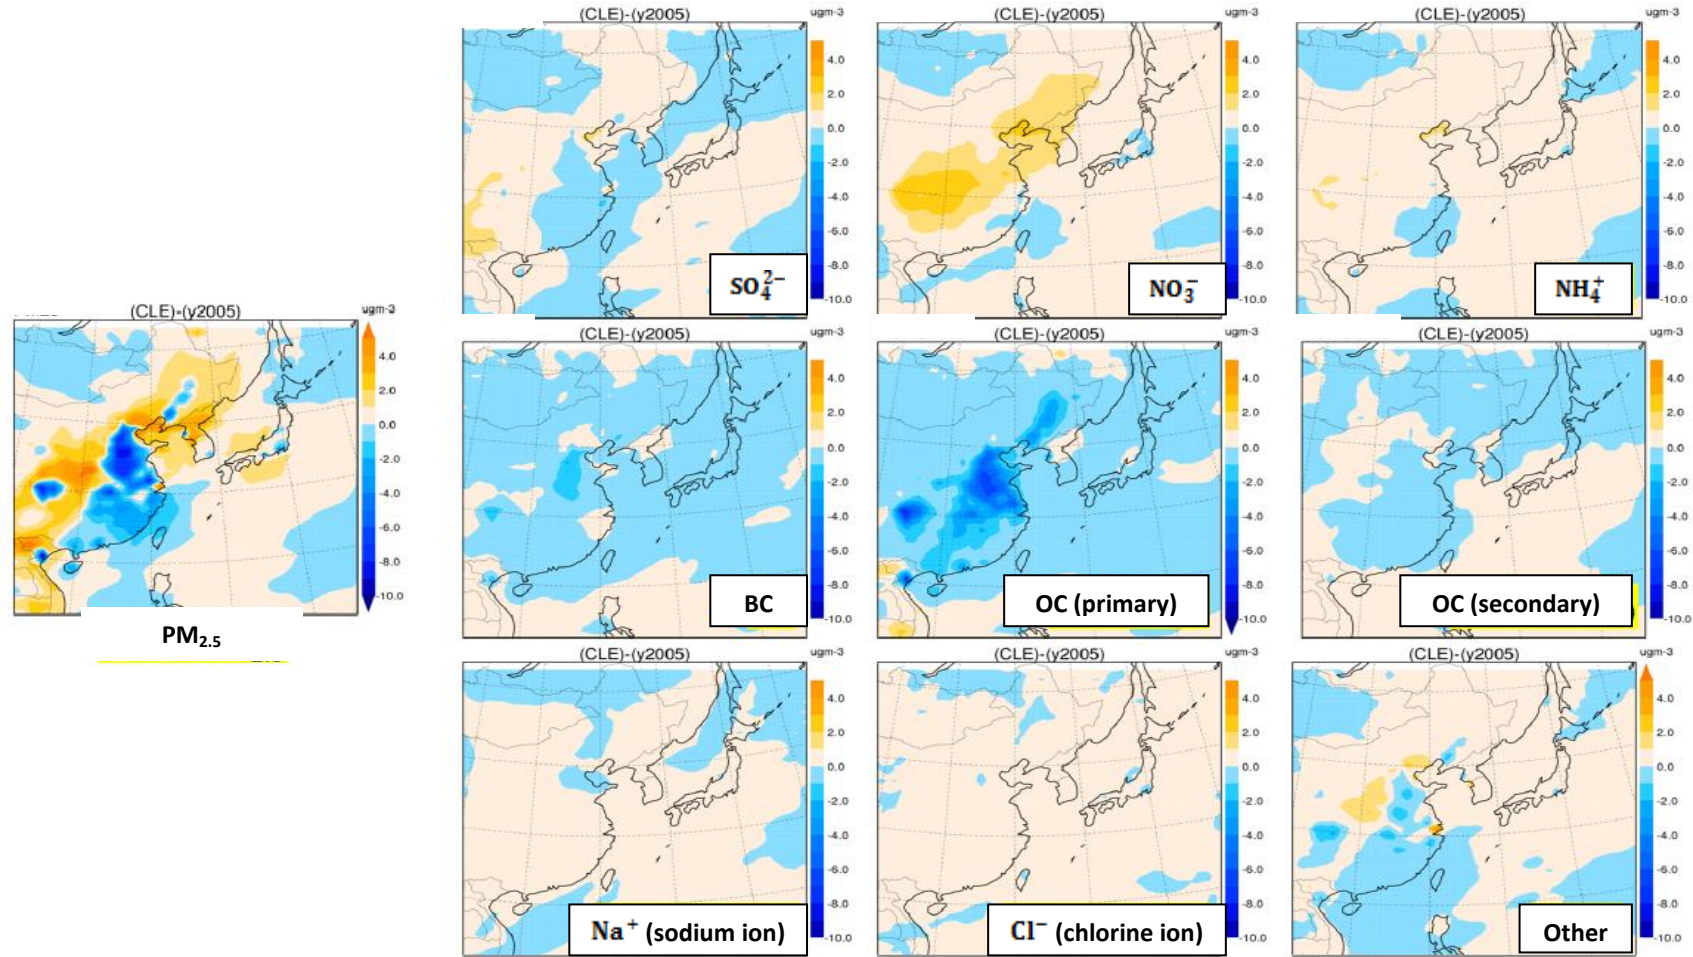

Figure S1. Changes in annual mean concentrations of PM<sub>2.5</sub> components between 2005 and 2030 under the CLE scenario

Note:  $\text{SO}_4^{2-}$ : sulfate ion,  $\text{NO}_3^-$ : nitrate ion;  $\text{NH}_4^+$ : ammonium ion; BC: black carbon; OC: organic aerosols;  $\text{Na}^+$ : sodium ion;  $\text{Cl}^-$ : chlorine ion; Other: other primary aerosols (including road dust and etc.).

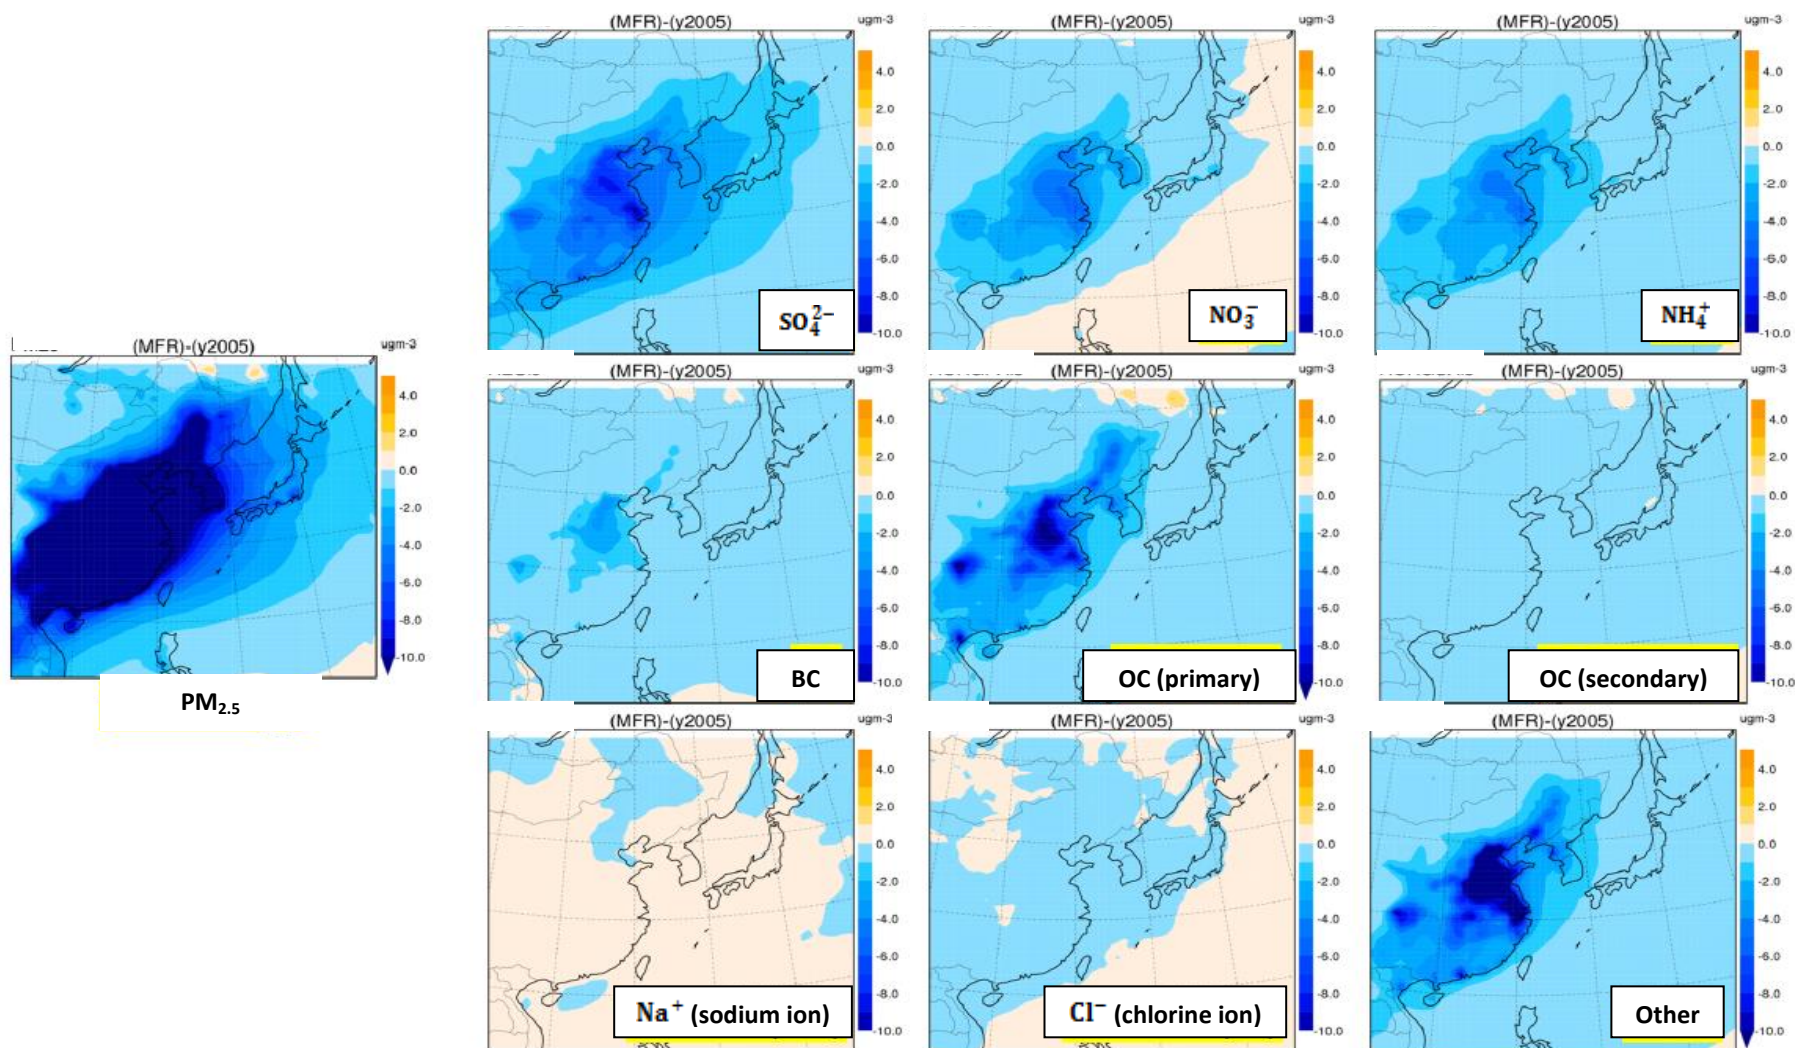

**Figure S2. Changes in annual mean concentrations of PM<sub>2.5</sub> components between 2005 and 2030 under the MFR scenario**

Note:  $\text{SO}_4^{2-}$ : sulfate ion;  $\text{NO}_3^-$ : nitrate ion;  $\text{NH}_4^+$ : ammonium ion; BC: black carbon; OC: organic aerosols;  $\text{Na}^+$ : sodium ion;  $\text{Cl}^-$ : chlorine ion; Other: other primary aerosols (including road dust and etc.).
